# Supplementary material for: Specific Hepatic Sphingolipids Relate to Insulin Resistance, Oxidative Stress, and Inflammation in Nonalcoholic Steatohepatitis
Source: Oxford University Press journal article supplement (doi:10.2337/dc17-1318), 2018-03-30
Supplement: dc171318supplementarydata.pdf [file dc171318supplementarydata.pdf]

SUPPLEMENTARY DATA

**Supplementary Table 1.** Mean values and standard deviation (SD) of sphingolipid species and sphingomyelins (SMS) in serum, liver, skeletal muscle, visceral (visc) and subcutaneous (subcut) adipose tissue.

| Sphingolipid species |       |      |       |      |       |      |                   |       |
|----------------------|-------|------|-------|------|-------|------|-------------------|-------|
|                      | CON   |      | NAFL- |      | NAFL+ |      | NASH              |       |
| Serum (ng/ml)        | mean  | SD   | mean  | SD   | mean  | SD   | mean              | SD    |
| Sphingosine          | 5.31  | 2.22 | 9.57  | 6.53 | 7.28  | 3.63 | 13.9              | 10.6  |
| Sphinganine          | 2.14  | 0.42 | 2.51  | 0.79 | 2.93  | 1.47 | 3.22              | 0.5   |
| Sphingosine 1P       | 495.  | 149. | 616.  | 241. | 630.  | 229. | 577.              | 89.9  |
| Sphinganine 1P       | 68.3  | 28.9 | 77.5  | 26.8 | 85.3  | 41.2 | 78.7              | 15.6  |
| Lactosyl14           | 71.2  | 30.  | 64.2  | 34.8 | 59.4  | 30.2 | 33.3              | 15.19 |
| Hexosyl140           | 8.41  | 3.57 | 5.24  | 1.08 | 5.93  | 2.28 | 3.51 ***          | 1.02  |
| Lactosyl16           | 1289. | 243. | 1371. | 595. | 1374. | 497. | 1212.             | 484.  |
| Ceramide140          | 1.51  | 0.38 | 1.9   | 0.74 | 2.28  | 1.49 | 1.98              | 0.56  |
| Hexosyl16            | 262.  | 84.7 | 299.  | 60.7 | 294.  | 98.2 | 362.              | 128.  |
| Lactosyl18           | 9.68  | 2.24 | 10.6  | 4.15 | 12.2  | 4.16 | 9.3               | 2.7   |
| Hexosyl18            | 6.35  | 2.32 | 8.37  | 2.64 | 8.71  | 2.7  | 8.16              | 2.6   |
| Ceramide160          | 5.03  | 1.77 | 6.89  | 2.32 | 5.96  | 1.47 | 8.65 ***          | 2.4   |
| Dihydro160           | 0.66  | 0.22 | 0.87  | 0.24 | 1.23  | 0.62 | 2.57 ***\$\$\$+++ | 1.3   |
| Lactosyl20           | 1.92  | 0.64 | 2.2   | 0.8  | 1.91  | 0.73 | 2.53              | 1.    |
| Ceramide18           | 4.51  | 1.69 | 7.53  | 5.29 | 8.16  | 4.31 | 7.87              | 3.3   |
| Hexosyl20            | 14.9  | 4.33 | 16.4  | 4.3  | 17.8  | 4.7  | 16.5              | 3.    |
| Dihydro180           | 1.75  | 0.56 | 3.3   | 1.99 | 4.95  | 2.68 | 7.55              | 7.8   |
| Lactosyl22           | 33.5  | 8.2  | 33.7  | 11.8 | 33.5  | 9.7  | 35.8              | 10.   |
| Lactosyl241          | 645.  | 113. | 586.  | 225. | 691.  | 271. | 537.              | 188.  |
| Hexosyl22            | 597.  | 142. | 635.  | 233. | 616.  | 292. | 760.              | 131.  |
| Ceramide20           | 11.8  | 4.03 | 14.7  | 4.93 | 15.3  | 3.77 | 13.9              | 3.9   |
| Hexosyl241           | 379.  | 79.1 | 399.  | 113. | 434.  | 113. | 391.              | 81.2  |
| LactosylC24          | 58.2  | 15.2 | 46.6  | 12.9 | 55.9  | 12.3 | 70.5 §            | 13.5  |
| Dihydro200           | 0.59  | 0.19 | 1.3   | 0.7  | 1.6 # | 0.82 | 1.19              | 0.09  |
| Hexosyl240           | 516.  | 92.3 | 525.  | 170. | 418.  | 58.8 | 457.              | 23.4  |
| Ceramide22           | 195.  | 44.1 | 251.  | 73.8 | 252.  | 104. | 178.              | 39.9  |
| Ceramide241          | 306.  | 98.2 | 361.  | 92.1 | 449.  | 146. | 389.              | 108.  |

SUPPLEMENTARY DATA

|                             |       |       |         |       |       |       |       |          |       |
|-----------------------------|-------|-------|---------|-------|-------|-------|-------|----------|-------|
| Dihydro220                  | 38.   | 6.5   | 48.7    | 10.1  | 66.8  | 37.5  | 94.   | **§      | 27.2  |
| Dihydro241                  | 45.   | 6.5   | 74.6    | 22.4  | 95.6  | 49.1  | 121.  | *        | 77.4  |
| Ceramide240                 | 1598. | 385.  | 1534.   | 355.  | 1813. | 864.  | 2161. | §        | 788.  |
| Dihydro240                  | 87.8  | 26.1  | 105.5   | 22.5  | 129.  | 55.5  | 175.  | **§      | 57.5  |
| <b>Liver (ng/mg tissue)</b> |       |       |         |       |       |       |       |          |       |
| Sphingosine                 | 3.1   | 0.62  | 3.1     | 1.2   | 3.3   | 0.88  | 2.1   |          | 1.05  |
| Sphinganine                 | 0.55  | 0.16  | 0.58    | 0.26  | 0.97  | 0.43  | 0.96  |          | 0.33  |
| Deoxysphingosine            | 0.001 | 0.001 | 0.001   | 0.001 | 0.002 | 0.002 | 0.02  |          | 0.05  |
| Sphingosine1P               | 0.84  | 0.38  | 0.72    | 0.24  | 0.78  | 0.26  | 0.38  |          | 0.21  |
| Deoxysphinganine            | 0.03  | 0.02  | 0.03    | 0.01  | 0.05  | 0.02  | 0.05  |          | 0.03  |
| Sphinganine1P               | 0.07  | 0.02  | 0.09 ¶¶ | 0.02  | 0.08  | 0.03  | 0.04  | §§*      | 0.03  |
| Lactosyl14                  | 0.16  | 0.03  | 0.16    | 0.07  | 0.12  | 0.03  | 0.09  | *§       | 0.04  |
| Hexosyl140                  | 0.018 | 0.004 | 0.017   | 0.009 | 0.015 | 0.004 | 0.024 |          | 0.012 |
| Lactosyl16                  | 3.2   | 0.33  | 4.2     | 1.3   | 3.9   | 1.2   | 4.7   |          | 1.75  |
| Ceramide140                 | 0.009 | 0.003 | 0.016   | 0.015 | 0.011 | 0.004 | 0.019 |          | 0.01  |
| Hexosyl16                   | 0.18  | 0.06  | 0.28    | 0.16  | 0.23  | 0.08  | 0.41  |          | 0.26  |
| Lactosyl18                  | 0.04  | 0.01  | 0.1     | 0.1   | 0.05  | 0.02  | 0.04  |          | 0.03  |
| Hexosyl18                   | 0.003 | 0.001 | 0.016   | 0.021 | 0.005 | 0.001 | 0.008 |          | 0.004 |
| Ceramide160                 | 0.03  | 0.01  | 0.062 ¶ | 0.03  | 0.04  | 0.01  | 0.04  |          | 0.03  |
| Dihydro160                  | 0.003 | 0.001 | 0.006   | 0.004 | 0.006 | 0.002 | 0.011 | **       | 0.005 |
| Lactosyl20                  | 0.012 | 0.004 | 0.019   | 0.013 | 0.015 | 0.006 | 0.017 |          | 0.013 |
| Ceramide18                  | 0.04  | 0.01  | 0.15    | 0.21  | 0.07  | 0.02  | 0.07  |          | 0.04  |
| Hexosyl20                   | 0.014 | 0.004 | 0.024   | 0.019 | 0.016 | 0.007 | 0.032 |          | 0.019 |
| Dihydro180                  | 0.024 | 0.011 | 0.043   | 0.025 | 0.049 | 0.049 | 0.052 |          | 0.02  |
| Lactosyl22                  | 0.63  | 0.15  | 0.79    | 0.47  | 0.64  | 0.2   | 0.85  |          | 0.25  |
| Lactosyl241                 | 2.8   | 0.45  | 3.8     | 1.5   | 3.4   | 1.3   | 4.7   | *        | 1.2   |
| Hexosyl22                   | 1.7   | 0.35  | 2.4     | 1.7   | 2.6   | 2.2   | 7.2   | §§§***++ | 2.9   |
| Ceramide20                  | 0.27  | 0.07  | 0.31    | 0.14  | 0.36  | 0.07  | 0.45  |          | 0.23  |
| Hexosyl241                  | 0.71  | 0.17  | 0.99    | 0.6   | 0.82  | 0.26  | 1.5   | *+       | 0.53  |
| LactosylC24                 | 1.4   | 0.42  | 1.8     | 0.88  | 1.5   | 0.46  | 2.4   |          | 0.95  |
| Dihydro200                  | 0.006 | 0.001 | 0.011   | 0.006 | 0.019 | 0.018 | 0.012 |          | 0.003 |
| Hexosyl240                  | 1.2   | 0.26  | 1.5     | 1.    | 1.3   | 0.52  | 2.7   |          | 0.93  |

SUPPLEMENTARY DATA

|                                           |       |       |       |       |       |       |       |          |       |
|-------------------------------------------|-------|-------|-------|-------|-------|-------|-------|----------|-------|
| Ceramide22                                | 2.7   | 0.36  | 2.9   | 0.7   | 3.1   | 0.4   | 2.7   |          | 0.54  |
| Ceramide241                               | 4.9   | 0.89  | 6.1   | 2.5   | 6.9   | 1.4   | 5.7   |          | 0.87  |
| Dihydro220                                | 0.07  | 0.02  | 0.11  | 0.04  | 0.15  | 0.08  | 0.17  | *        | 0.11  |
| Dihydro241                                | 0.12  | 0.04  | 0.23  | 0.15  | 0.34  | 0.24  | 0.43  | *        | 0.21  |
| Ceramide24                                | 8.5   | 1.1   | 8.1   | 2.2   | 9.5   | 3.1   | 17.4  | §§§***++ | 4.8   |
| <b>Skeletal muscle<br/>(ng/mg tissue)</b> |       |       |       |       |       |       |       |          |       |
| Sphingosine                               | 0.13  | 0.06  | 0.13  | 0.02  | 0.15  | 0.08  | 0.18  |          | 0.03  |
| Sphinganine                               | 0.04  | 0.02  | 0.04  | 0.01  | 0.04  | 0.02  | 0.05  |          | 0.02  |
| Sphingosine1P                             | 0.07  | 0.21  | 0.07  | 0.16  | 0.04  | 0.16  | 0.12  |          |       |
| Sphinganine1P                             | 0.04  | 0.04  | 0.06  | 0.02  | 0.03  | 0.02  | 0.03  |          | 0.03  |
| Lactosyl14                                | 0.05  | 0.02  | 0.05  | 0.02  | 0.04  | 0.02  | 0.03  |          | 0.02  |
| Hexosyl140                                | 0.004 | 0.001 | 0.006 | 0.003 | 0.004 | 0.002 | 0.006 |          | 0.006 |
| Lactosyl16                                | 1.8   | 0.75  | 2.1   | 0.73  | 1.4   | 0.47  | 1.2   |          | 1.3   |
| Ceramide140                               | 0.05  | 0.02  | 0.03  | 0.02  | 0.04  | 0.02  | 0.04  |          | 0.03  |
| Hexosyl16                                 | 0.22  | 0.15  | 0.22  | 0.11  | 0.15  | 0.08  | 0.15  |          | 0.13  |
| Lactosyl18                                | 0.37  | 0.15  | 0.2   | 0.06  | 0.25  | 0.13  | 0.15  |          | 0.3   |
| Hexosyl18                                 | 0.07  | 0.04  | 0.22  | 0.36  | 0.07  | 0.04  | 0.33  |          | 0.75  |
| Ceramide160                               | 0.17  | 0.1   | 0.09  | 0.05  | 0.12  | 0.08  | 0.14  |          | 0.2   |
| Dihydro160                                | 0.011 | 0.008 | 0.004 | 0.002 | 0.005 | 0.004 | 0.01  |          | 0.013 |
| Ceramide18                                | 1.3   | 1.3   | 0.58  | 0.33  | 0.92  | 0.59  | 0.44  |          | 0.54  |
| Hexosyl20                                 | 0.041 | 0.023 | 0.15  | 0.25  | 0.023 | 0.013 | 0.24  |          | 0.581 |
| Dihydro180                                | 0.08  | 0.075 | 0.034 | 0.015 | 0.05  | 0.042 | 0.021 |          | 0.033 |
| Lactosyl22                                | 0.28  | 0.16  | 0.19  | 0.09  | 0.17  | 0.1   | 0.14  |          | 0.19  |
| Lactosyl241                               | 3.5   | 2.4   | 3.2   | 1.3   | 2.4   | 1.1   | 1.7   |          | 2.9   |
| Hexosyl22                                 | 0.94  | 0.25  | 2.8   | 3.5   | 0.81  | 0.37  | 4.8   |          | 10.1  |
| Ceramide20                                | 0.23  | 0.12  | 0.14  | 0.04  | 0.16  | 0.06  | 0.16  |          | 0.11  |
| Hexosyl241                                | 0.61  | 0.2   | 2.4   | 3.3   | 0.45  | 0.2   | 2.5   |          | 5.4   |
| LactosylC24                               | 0.77  | 0.43  | 0.68  | 0.42  | 0.51  | 0.26  | 0.4   |          | 0.45  |
| Dihydro200                                | 0.015 | 0.011 | 0.012 | 0.006 | 0.009 | 0.008 | 0.049 |          | 0.105 |
| Hexosyl240                                | 0.87  | 0.27  | 3.9   | 5.3   | 0.42  | 0.24  | 2.2   |          | 4.3   |
| Ceramide22                                | 0.65  | 0.15  | 0.86  | 0.19  | 0.66  | 0.13  | 0.86  |          | 0.18  |

SUPPLEMENTARY DATA

|                                |       |       |       |       |       |   |       |       |           |       |
|--------------------------------|-------|-------|-------|-------|-------|---|-------|-------|-----------|-------|
| Ceramide241                    | 2.7   | 0.67  | 3.1   | 0.69  | 3.1   |   | 0.79  | 2.8   |           | 0.81  |
| Dihydro220                     | 0.048 | 0.018 | 0.062 | 0.013 | 0.038 |   | 0.011 | 0.047 |           | 0.026 |
| Dihydro241                     | 0.061 | 0.04  | 0.083 | 0.034 | 0.056 |   | 0.019 | 0.083 |           | 0.06  |
| Ceramide240                    | 2.9   | 0.4   | 3.1   | 0.4   | 3.    |   | 1.2   | 5.6   | ***§§§+++ | 1.2   |
| Dihydro240                     | 0.082 | 0.036 | 0.096 | 0.017 | 0.062 |   | 0.022 | 0.108 |           | 0.063 |
| <b>Visc fat (ng/mg tissue)</b> |       |       |       |       |       |   |       |       |           |       |
| Sphingosine                    | 0.131 | 0.039 | 0.092 | 0.037 | 0.094 |   | 0.023 | 0.098 |           | 0.022 |
| Sphinganine                    | 0.032 | 0.011 | 0.023 | 0.007 | 0.024 |   | 0.008 | 0.023 |           | 0.005 |
| Sphingosine1P                  | 0.053 | 0.023 | 0.04  | 0.012 | 0.03  | # | 0.011 | 0.018 | **        | 0.005 |
| Deoxysphinganine               | 0.001 | 0.001 | 0.001 | 0.001 | 0.002 |   | 0.001 | 0.002 |           | 0.001 |
| Sphinganine1P                  | 0.013 | 0.005 | 0.017 | 0.011 | 0.01  |   | 0.006 | 0.005 | §         | 0.002 |
| Lactosyl14                     | 0.036 | 0.03  | 0.017 | 0.005 | 0.021 |   | 0.006 | 0.018 |           | 0.005 |
| Hexosyl140                     | 0.004 | 0.002 | 0.003 | 0.001 | 0.003 |   | 0.001 | 0.002 |           | 0.001 |
| Lactosyl16                     | 1.64  | 2.37  | 0.71  | 0.35  | 0.73  |   | 0.39  | 0.48  |           | 0.13  |
| Ceramide140                    | 0.15  | 0.05  | 0.17  | 0.04  | 0.17  |   | 0.04  | 0.14  |           | 0.03  |
| Hexosyl16                      | 0.51  | 0.1   | 0.44  | 0.13  | 0.46  |   | 0.13  | 0.234 | **§+      | 0.11  |
| Lactosyl18                     | 0.06  | 0.05  | 0.08  | 0.07  | 0.07  |   | 0.04  | 0.04  |           | 0.02  |
| Hexosyl18                      | 0.021 | 0.005 | 0.029 | 0.011 | 0.03  |   | 0.016 | 0.009 | §++       | 0.004 |
| Ceramide160                    | 0.66  | 0.22  | 0.82  | 0.12  | 0.79  |   | 0.19  | 0.57  |           | 0.16  |
| Dihydro160                     | 0.043 | 0.01  | 0.04  | 0.008 | 0.038 |   | 0.014 | 0.042 |           | 0.016 |
| Ceramide181                    | 0.004 | 0.001 | 0.006 | 0.003 | 0.007 |   | 0.003 | 0.006 |           | 0.002 |
| Lactosyl20                     | 0.049 | 0.02  | 0.069 | 0.024 | 0.067 |   | 0.045 | 0.023 | §         | 0.009 |
| Ceramide18                     | 0.118 | 0.025 | 0.2   | 0.105 | 0.163 |   | 0.072 | 0.091 | §         | 0.026 |
| Hexosyl20                      | 0.084 | 0.013 | 0.084 | 0.021 | 0.092 |   | 0.026 | 0.047 | *§++      | 0.018 |
| Dihydro180                     | 0.015 | 0.006 | 0.019 | 0.008 | 0.014 |   | 0.007 | 0.012 |           | 0.005 |
| Lactosyl22                     | 0.4   | 0.17  | 0.47  | 0.21  | 0.39  |   | 0.18  | 0.41  |           | 0.13  |
| Lactosyl241                    | 2.4   | 3.78  | 1.34  | 0.69  | 1.55  |   | 1.03  | 1.03  |           | 0.37  |
| Hexosyl22                      | 1.14  | 0.28  | 0.97  | 0.32  | 0.87  |   | 0.13  | 0.96  |           | 0.27  |
| Ceramide20                     | 0.41  | 0.11  | 0.41  | 0.06  | 0.39  |   | 0.08  | 0.31  |           | 0.07  |
| Hexosyl241                     | 0.28  | 0.08  | 0.21  | 0.07  | 0.25  |   | 0.06  | 0.2   |           | 0.08  |
| LactosylC24                    | 0.44  | 0.31  | 0.37  | 0.15  | 0.32  |   | 0.11  | 0.32  |           | 0.08  |
| Dihydro200                     | 0.01  | 0.01  | 0.01  | 0.001 | 0.01  |   | 0.01  | 0.003 | §         | 0.001 |

SUPPLEMENTARY DATA

|                                  |       |       |         |       |            |       |             |       |
|----------------------------------|-------|-------|---------|-------|------------|-------|-------------|-------|
| Hexosyl240                       | 0.41  | 0.18  | 0.244 ¶ | 0.08  | 0.225 #    | 0.04  | 0.26        | 0.07  |
| Ceramide22                       | 2.33  | 0.71  | 2.09    | 0.5   | 1.73       | 0.34  | 1.54 *      | 0.19  |
| Ceramide241                      | 4.42  | 0.68  | 4.4     | 0.69  | 4.64       | 1.31  | 3.08 +      | 0.77  |
| Dihydro220                       | 0.12  | 0.04  | 0.09    | 0.03  | 0.07 #     | 0.03  | 0.053 **    | 0.01  |
| Dihydro241                       | 0.1   | 0.04  | 0.1     | 0.02  | 0.09       | 0.03  | 0.07        | 0.04  |
| Ceramide240                      | 6.13  | 1.6   | 4.306 ¶ | 1.04  | 3.998 ##   | 0.67  | 4.3 *       | 0.76  |
| Dihydro240                       | 0.08  | 0.03  | 0.05    | 0.02  | 0.05       | 0.02  | 0.05        | 0.01  |
| <b>Subcut fat (ng/mg tissue)</b> |       |       |         |       |            |       |             |       |
| Sphingosine                      | 0.149 | 0.094 | 0.137   | 0.06  | 0.179      | 0.089 | 0.181       | 0.03  |
| Sphinganine                      | 0.034 | 0.023 | 0.029   | 0.015 | 0.062      | 0.069 | 0.036       | 0.009 |
| Sphingosine1P                    | 0.101 | 0.073 | 0.071   | 0.031 | 0.096      | 0.054 | 0.066       | 0.047 |
| Deoxysphinganine                 | 0.001 | 0.001 | 0.002   | 0.001 | 0.003 #### | 0.001 | 0.002 *     | 0.001 |
| Sphinganine1P                    | 0.024 | 0.021 | 0.02    | 0.01  | 0.024      | 0.013 | 0.019       | 0.019 |
| Lactosyl14                       | 0.036 | 0.01  | 0.03    | 0.016 | 0.03       | 0.013 | 0.032       | 0.017 |
| Hexosyl140                       | 0.006 | 0.002 | 0.004   | 0.001 | 0.006      | 0.002 | 0.005       | 0.001 |
| Lactosyl16                       | 1.51  | 1.25  | 1.21    | 0.73  | 1.07       | 0.52  | 0.77        | 0.3   |
| Ceramide140                      | 0.12  | 0.03  | 0.14    | 0.05  | 0.14       | 0.03  | 0.09        | 0.02  |
| Hexosyl16                        | 0.5   | 0.15  | 0.51    | 0.11  | 0.6        | 0.14  | 0.32 ++     | 0.13  |
| Lactosyl18                       | 0.09  | 0.06  | 0.11    | 0.04  | 0.08       | 0.02  | 0.05 §      | 0.03  |
| Hexosyl18                        | 0.13  | 0.25  | 0.05    | 0.02  | 0.07       | 0.06  | 0.06        | 0.1   |
| Ceramide160                      | 0.66  | 0.26  | 0.66    | 0.27  | 0.56       | 0.21  | 0.25 *§     | 0.07  |
| Dihydro160                       | 0.04  | 0.02  | 0.03    | 0.02  | 0.03       | 0.01  | 0.02        | 0.01  |
| Lactosyl20                       | 0.07  | 0.02  | 0.07    | 0.03  | 0.05       | 0.02  | 0.02 ***§§§ | 0.01  |
| Ceramide18                       | 0.08  | 0.02  | 0.12    | 0.04  | 0.12       | 0.04  | 0.06 §§++   | 0.01  |
| Hexosyl20                        | 0.11  | 0.1   | 0.07    | 0.02  | 0.11       | 0.06  | 0.09        | 0.11  |
| Dihydro180                       | 0.02  | 0.01  | 0.02    | 0.01  | 0.02       | 0.01  | 0.01        | 0.01  |
| Lactosyl22                       | 0.59  | 0.23  | 0.54    | 0.23  | 0.37       | 0.11  | 0.36        | 0.17  |
| Lactosyl241                      | 2.4   | 1.92  | 2.03    | 1.27  | 2.2        | 1.35  | 1.21        | 0.42  |
| Hexosyl22                        | 1.23  | 0.76  | 0.96    | 0.21  | 1.47       | 1.27  | 1.84        | 2.04  |
| Ceramide20                       | 0.17  | 0.04  | 0.18    | 0.06  | 0.16       | 0.04  | 0.11 §      | 0.03  |
| Hexosyl241                       | 0.55  | 0.87  | 0.23    | 0.09  | 0.64       | 0.86  | 0.97        | 1.77  |

SUPPLEMENTARY DATA

|                             |        |        |        |        |        |        |        |        |
|-----------------------------|--------|--------|--------|--------|--------|--------|--------|--------|
| LactosylC24                 | 0.54   | 0.2    | 0.44   | 0.17   | 0.38   | 0.12   | 0.33   | 0.13   |
| Dihydro200                  | 0.01   | 0.01   | 0.01   | 0.01   | 0.01   | 0.01   | 0.02   | 0.02   |
| Hexosyl240                  | 0.83   | 1.44   | 0.29   | 0.11   | 0.62   | 0.81   | 0.92   | 1.48   |
| Ceramide22                  | 1.24   | 0.22   | 1.5    | 0.37   | 1.1    | 0.24   | 0.84   | §§     |
| Ceramide241                 | 2.68   | 0.96   | 3.43   | 0.8    | 3.17   | 1.2    | 2.01   | 0.89   |
| Dihydro220                  | 0.11   | 0.04   | 0.1    | 0.02   | 0.09   | 0.03   | 0.05   | *      |
| Dihydro241                  | 0.09   | 0.05   | 0.1    | 0.04   | 0.09   | 0.04   | 0.06   | 0.05   |
| Ceramide240                 | 3.06   | 0.76   | 2.62   | 0.45   | 2.46   | 0.56   | 2.9    | 0.45   |
| Dihydro240                  | 0.09   | 0.05   | 0.07   | 0.02   | 0.09   | 0.08   | 0.07   | 0.02   |
| <b>Serum (ng/ml)</b>        |        |        |        |        |        |        |        |        |
| SMS161                      | 7897.  | 1586.  | 9038.  | 2272.  | 8510.  | 1635.  | 7498.  | 1355.  |
| SMS140                      | 4504.  | 521.   | 4473.  | 1073.  | 4316.  | 585.   | 4167.  | 1007.  |
| SMS160                      | 55442. | 9127.  | 54043. | 9669.  | 51358. | 9472.  | 43728. | 10064. |
| SMS181                      | 5280.  | 1892.  | 6217.  | 1632.  | 6606.  | 1725.  | 5887.  | 2736.  |
| SMS18                       | 11441. | 3375.  | 12918. | 3823.  | 14148. | 3904.  | 11842. | 6365.  |
| SMS20                       | 8719.  | 1872.  | 8155.  | 1338.  | 8059.  | 959.   | 7337.  | 1263.  |
| SMS221                      | 16571. | 2586.  | 16519. | 3334.  | 15872. | 2561.  | 13783. | 3877.  |
| SMS22                       | 17245. | 3018.  | 16798. | 3045.  | 15993. | 2045.  | 15516. | 2864.  |
| SMS241                      | 44300. | 11249. | 42571. | 12063. | 44424. | 11713. | 38779. | 14609. |
| SMS24                       | 13739. | 2854.  | 12287. | 2621.  | 11412. | 1793.  | 11046. | 3166.  |
| <b>Liver (ng/mg tissue)</b> |        |        |        |        |        |        |        |        |
| SMS161                      | 9.87   | 2.5    | 10.5   | 3.78   | 11.5   | 3.21   | 9.29   | 1.3    |
| SMS140                      | 8.46   | 0.68   | 7.95   | 2.71   | 8.15   | 1.26   | 8.64   | 1.32   |
| SMS160                      | 164.   | 19.24  | 145.   | 49.7   | 161.   | 42.1   | 167.   | 37.7   |
| SMS181                      | 7.19   | 2.63   | 8.08   | 2.46   | 8.98   | 1.67   | 10.68  | 3.62   |
| SMS18                       | 49.    | 13.    | 51.    | 13.    | 56.    | 11.    | 66.    | 27.    |
| SMS20                       | 44.    | 5.13   | 33.    | 12.    | 38.    | 5.32   | 37.    | 12.    |
| SMS221                      | 34.9   | 3.75   | 29.3   | 9.54   | 31.6   | 2.91   | 30.3   | 4.01   |
| SMS22                       | 129.   | 15.7   | 97.5   | 32.3   | 110.   | 20.9   | 126.   | 24.6   |
| SMS241                      | 180.   | 36.7   | 146.1  | 51.4   | 168.   | 40.8   | 176.   | 45.    |
| SMS24                       | 141.   | 20.6   | 96.8   | ¶¶     | 31.4   | 103.   | #      | 21.6   |
|                             |        |        |        |        |        | 118.   |        | 18.7   |

SUPPLEMENTARY DATA

|                                       |      |      |      |      |      |      |       |      |
|---------------------------------------|------|------|------|------|------|------|-------|------|
| <b>Skeletal muscle (ng/mg tissue)</b> |      |      |      |      |      |      |       |      |
| SMS161                                | 3.36 | 1.4  | 4.16 | 1.04 | 3.75 | 0.91 | 4.59  | 2.04 |
| SMS140                                | 2.96 | 0.63 | 3.31 | 0.74 | 3.19 | 1.18 | 3.74  | 1.21 |
| SMS160                                | 54.5 | 22.6 | 56.  | 10.1 | 57.1 | 20.5 | 62.6  | 27.5 |
| SMS181                                | 6.47 | 0.74 | 6.73 | 1.52 | 6.5  | 0.98 | 7.74  | 0.81 |
| SMS18                                 | 46.7 | 6.89 | 45.2 | 6.73 | 44.7 | 6.97 | 48.1  | 12.7 |
| SMS20                                 | 6.74 | 2.61 | 8.43 | 4.73 | 5.79 | 1.95 | 10.7  | 9.11 |
| SMS221                                | 8.26 | 2.26 | 10.1 | 3.34 | 9.27 | 4.05 | 9.75  | 7.58 |
| SMS22                                 | 22.4 | 4.08 | 26.4 | 7.51 | 22.1 | 7.23 | 31.1  | 14.1 |
| SMS241                                | 50.9 | 20.2 | 62.2 | 26.9 | 59.4 | 16.1 | 78.9  | 49.2 |
| SMS24                                 | 29.6 | 8.37 | 31.9 | 10.6 | 27.5 | 6.93 | 40.5  | 23.  |
| <b>Visc fat (ng/mg tissue)</b>        |      |      |      |      |      |      |       |      |
| SMS161                                | 3.69 | 1.2  | 4.32 | 2.18 | 4.31 | 1.37 | 5.46  | 1.14 |
| SMS140                                | 3.33 | 0.87 | 2.93 | 1.07 | 2.83 | 0.87 | 3.69  | 0.84 |
| SMS160                                | 60.2 | 13.2 | 45.6 | 20.5 | 45.8 | 16.4 | 55.9  | 10.1 |
| SMS181                                | 1.61 | 0.41 | 1.65 | 0.61 | 1.81 | 0.74 | 2.48  | 1.05 |
| SMS18                                 | 8.44 | 1.65 | 6.63 | 1.66 | 7.4  | 2.61 | 8.98  | 2.66 |
| SMS20                                 | 9.19 | 1.92 | 6.85 | 2.8  | 7.55 | 2.29 | 9.35  | 1.68 |
| SMS221                                | 8.68 | 3.33 | 7.65 | 3.75 | 7.81 | 2.67 | 9.04  | 4.71 |
| SMS22_                                | 21.8 | 7.02 | 15.2 | 7.7  | 14.5 | 4.77 | 19.8  | 4.83 |
| SMS241                                | 29.4 | 5.43 | 21.1 | 10.1 | 25.3 | 12.1 | 36.3  | 10.1 |
| SMS24                                 | 16.6 | 6.2  | 9.45 | 4.36 | 9.71 | 4.13 | 13.4  | 3.68 |
| <b>Subcut fat (ng/mg tissue)</b>      |      |      |      |      |      |      |       |      |
| SMS161                                | 7.54 | 2.42 | 8.73 | 5.06 | 10.  | 3.5  | 11.07 | 3.46 |
| SMS140                                | 4.87 | 1.37 | 4.55 | 2.16 | 5.33 | 1.8  | 5.73  | 1.05 |
| SMS160                                | 68.7 | 17.4 | 59.7 | 34.1 | 67.1 | 21.6 | 73.1  | 12.6 |
| SMS181                                | 2.61 | 1.35 | 2.97 | 1.97 | 3.54 | 1.74 | 4.52  | 1.9  |
| SMS18                                 | 9.56 | 4.86 | 8.42 | 4.61 | 10.1 | 4.51 | 12.9  | 3.37 |

SUPPLEMENTARY DATA

|        |      |      |      |      |      |      |      |      |
|--------|------|------|------|------|------|------|------|------|
| SMS20  | 9.05 | 4.48 | 7.6  | 4.02 | 7.96 | 3.   | 10.5 | 1.43 |
| SMS221 | 11.6 | 3.2  | 11.9 | 6.54 | 12.2 | 4.59 | 15.7 | 3.84 |
| SMS22  | 24.2 | 7.45 | 21.3 | 9.91 | 20.2 | 6.47 | 24.9 | 4.18 |
| SMS241 | 32.3 | 14.7 | 28.3 | 17.4 | 36.  | 14.5 | 51.1 | 12.  |
| SMS24  | 18.9 | 8.27 | 13.4 | 7.3  | 14.8 | 5.03 | 20.1 | 4.72 |

$p \leq 0.05$ . ¶¶  $p \leq 0.01$ . ¶¶¶  $p < 0.001$  CON vs NAFL-  
 #  $p \leq 0.05$ . ##  $p \leq 0.01$ . ###  $p < 0.001$  CON vs NAFL+  
 \*  $p \leq 0.05$ . \*\*  $p \leq 0.01$ . \*\*\*  $p < 0.001$  CON vs NASH  
 †  $p \leq 0.05$ . ††  $p \leq 0.01$ . †††  $p < 0.001$  NAFL- vs NAFL+  
 §  $p \leq 0.05$ . §§  $p \leq 0.01$ . §§§  $p < 0.001$  NAFL- vs NASH  
 +  $p \leq 0.05$ . ++  $p \leq 0.01$ . +++  $p < 0.001$  NAFL+ vs NASH

**Supplementary Table 2.** Associations between hepatic ceramide species and total hepatic ceramides and state u respiration and TBARS in all groups.

|        | State u respiration           |                     | TBARS                 |
|--------|-------------------------------|---------------------|-----------------------|
|        | Hepatic lactosylceramide 14:0 | Hepatic sphinganine | Liver total ceramides |
| CON    | t= -0.40<br>p=0.69            | t= 0.24<br>p=0.81   | t= 0.75<br>p=0.46     |
| NAFL – | t=2.90<br>p=0.01              | t= 0.75<br>p=0.46   | t= -0.45<br>p=0.65    |
| NAFL+  | t= 0.49<br>p=0.62             | t= 0.44<br>p=0.65   | t= 0.30<br>p=0.76     |
| NASH   | t= 0.49<br>p=0.63             | t= 0.31<br>p=0.75   | t= 2.78<br>p=0.01     |



SUPPLEMENTARY DATA

**Supplementary Figure 1.** Correlation between maximal uncoupled (state u) respiration in hepatic isolated mitochondria and in liver tissue (CON: blue circles. NAFL-: yellow circles. NAFL+: orange circles. NASH: red circles).

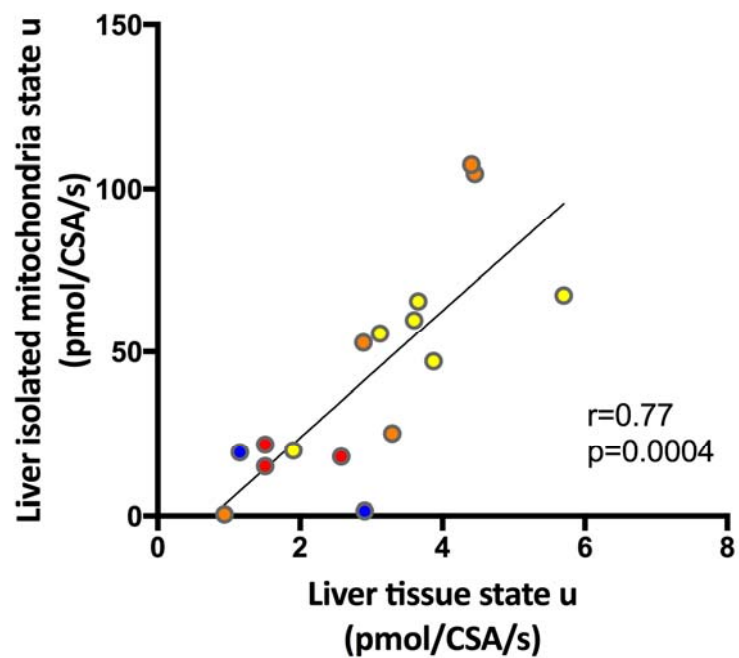

SUPPLEMENTARY DATA

**Supplementary Figure 2.** Correlations between liver and serum levels of dihydroceramide species (DHC) and sphingomyelins (SMS) (CON: blue circles. NAFL-: yellow circles. NAFL+: orange circles. NASH: red circles)

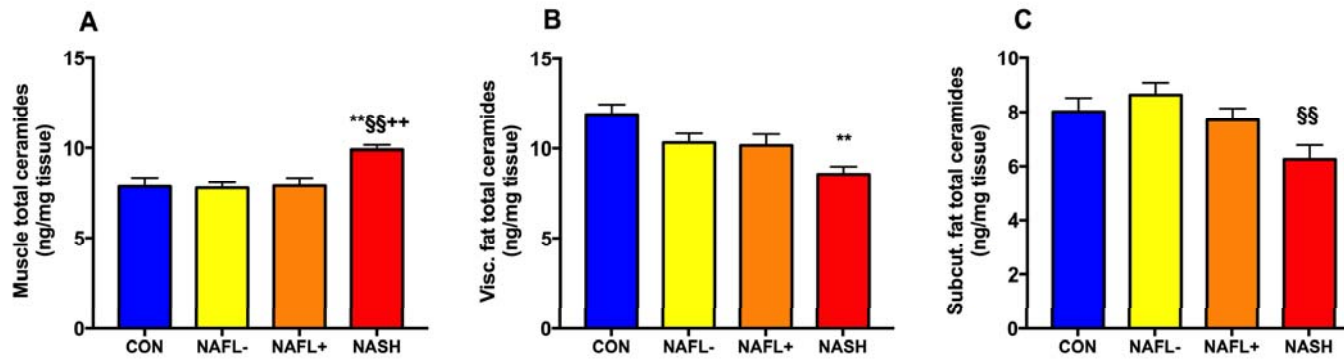

## SUPPLEMENTARY DATA

**Supplementary Figure 3.** Total ceramides in skeletal muscle, subcutaneous (subcut fat) and visceral fat (visc fat) in lean individuals (CON) and obese participants without NAFL- and with NAFL+ and NASH.

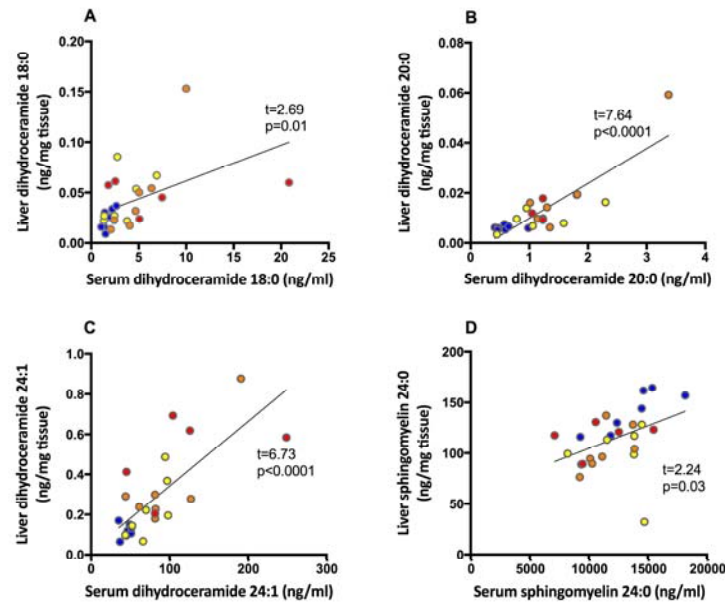

Data are presented as mean  $\pm$  standard error of mean.

¶  $p \leq 0.05$ . ¶¶  $p \leq 0.01$ . ¶¶¶  $p < 0.001$  CON vs NAFL-  
#  $p \leq 0.05$ . ##  $p \leq 0.01$ . ###  $p < 0.001$  CON vs NAFL+  
\*  $p \leq 0.05$ . \*\*  $p \leq 0.01$ . \*\*\*  $p < 0.001$  CON vs NASH  
‡  $p \leq 0.05$ . ††  $p \leq 0.01$ . †††  $p < 0.001$  NAFL- vs NAFL+  
§  $p \leq 0.05$ . §§  $p \leq 0.01$ . §§§  $p < 0.001$  NAFL- vs NASH  
+  $p \leq 0.05$ . ++  $p \leq 0.01$ . +++  $p < 0.001$  NAFL+ vs NASH
